# Supplementary material for: Reactivity of U-associated osteopontin with lactoferrin: a one-to-many complex
Source: Royal Society of Chemistry journal article supplement (doi:10.1039/c7mt00087a), 2017-01-01
Supplement: c7mt00087a1.pdf [file c7mt00087a1.pdf]

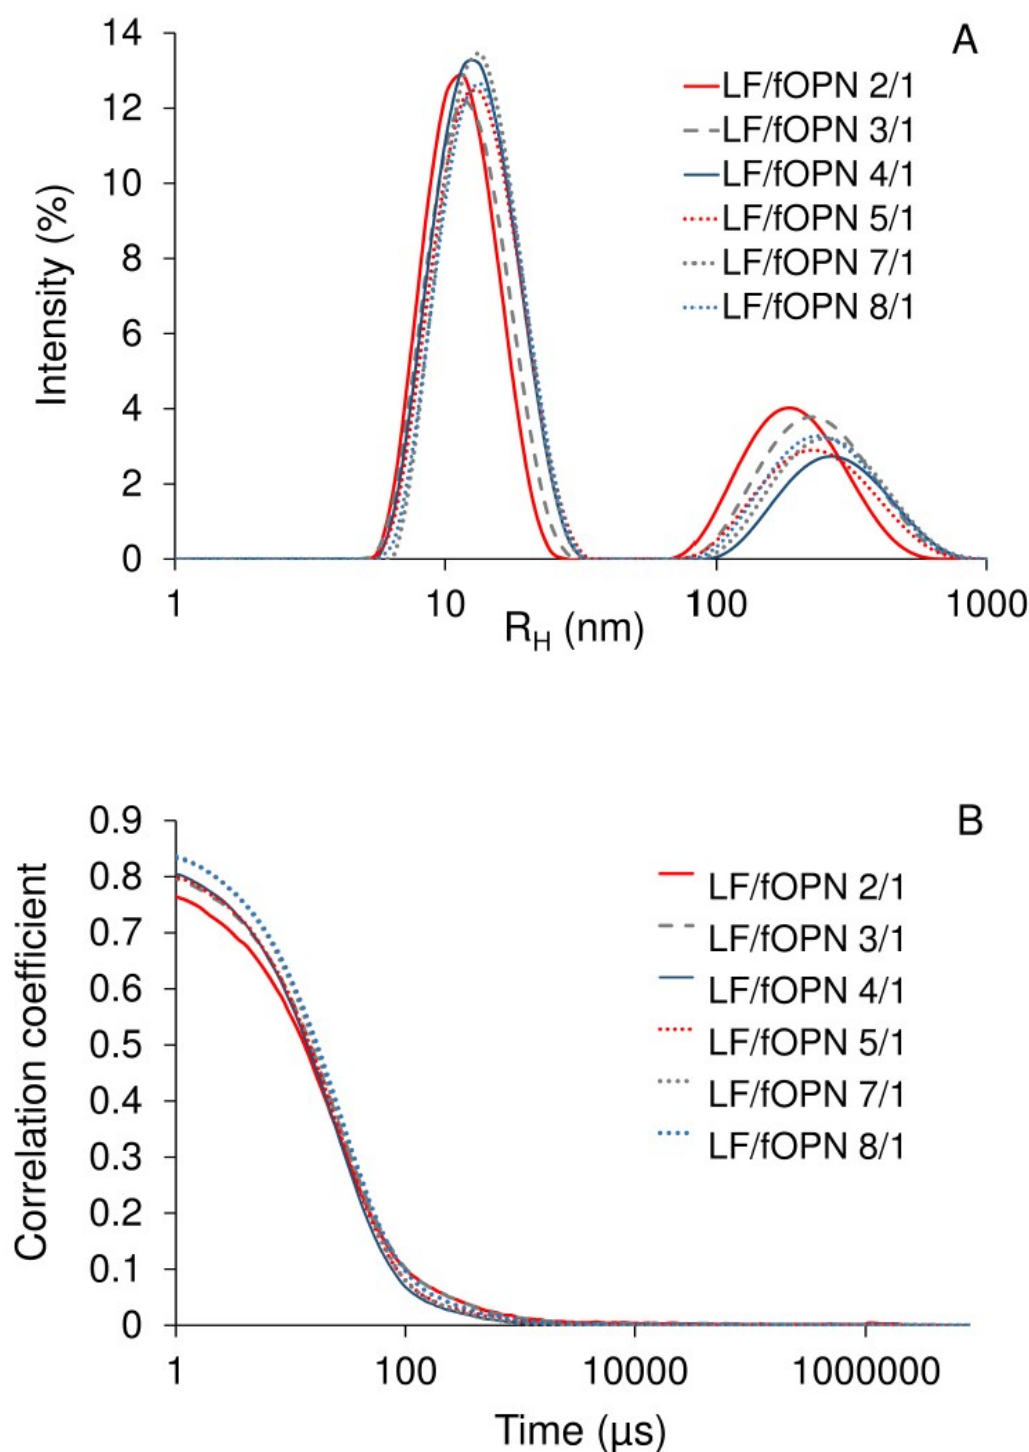

**Figure S1.** LF/fOPN interaction investigation by DLS.

(A) Dynamic light scattering size distribution is expressed in percent intensity against  $R_H$  (nm) in logarithmic scale for various LF/fOPN ratios. (B) Corresponding correlation curves.

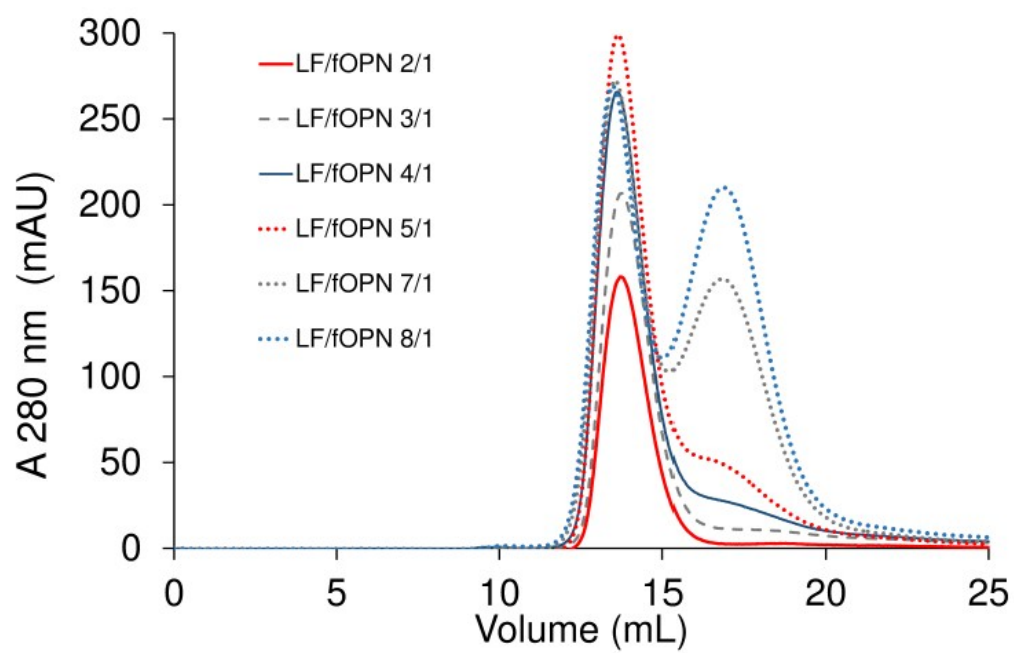

**Figure S2.** Interaction of LF and fOPN assessed by SEC on Sephacryl® S-300 HR.

The absorbance variations at 280 nm versus the elution volume (mL) are reported for various LF/fOPN ratios.
